# Supplementary material
Source: PubMed Central journal article supplement (PMC6068031)
Supplement: 2017_171785-Disclosures_and_Contributions.pdf [file 2017_171785-Disclosures_and_Contributions.pdf]

Haematologica  
HAEMATOL/2017/171785  
Version 5

miR-181a regulates erythroid enucleation via the regulation of Xpo7  
expression

Amalia Avila Figueroa, James D. Fasano, Sandra Martinez-Morilla,  
Srividhya Venkatesan, Gary Kupfer, and Shilpa M. Hattangadi

Disclosures: None.

Contributions: AAF, GK, and SMH designed experiments. AAF, GDF, SMM, SV, and SMH performed experiments. AAF, GDF, SMM, SV, and SMH performed data analysis. AAF and SMH wrote the manuscript. GK and SMH revised the manuscript.
